# Supplementary material
Source: Elsevier journal article supplement (https://www.sciencedirect.com/science/article/pii/S1134009618301980)
Supplement: mmc2 [file S1134009618301980:mmc2.docx]

**ANEXO II.** RELACIÓN DE HOSPITALES QUE ENVIARON SUS DATOS AL REGISTRO DE LA SECTCV DURANTE EL PERIODO 2012-2017.

1. **Hospital General Universitario de Valencia.** Valencia.
2. **Grupo Cardiovascular**. Málaga
3. **Hospital Universitario Gregorio Marañón (Infantil).** Madrid.
4. **Hospital Universitario Ramón y Cajal (Infantil).** Madrid.
5. **Hospital Universitario La Paz (Infantil).** Madrid.
6. **Hospital Clínico Universitario de Santiago.** A Coruña.
7. **Complejo Hospitalario de Navarra.** Navarra.
8. **Hospital Universitario Central de Asturias.** Oviedo.Asturias.
9. **Hospital Universitario Virgen de la Victoria.** Málaga.
10. **Hospital Universitario Infanta Cristina.** Badajoz.
11. **Hospital Universitario Virgen de la Arrixaca (Adultos e Infantil).** Murcia.
12. **Hospital Universitario de Canarias.** La Laguna. Sta. Cruz de Tenerife.
13. **Hospital Universitari Germans Trias i Pujol (Can Ruti).** Badalona. Barcelona
14. **Hospital Clínico Universitario de Valladolid.** Valladolid.
15. **Hospital Universitario Puerta del Mar.** Cádiz.
16. **Clínica Quirón salud.** Albacete
17. **Hospital Universitario La Paz (Adultos).** Madrid.
18. **Hospital Universitario La Fé (Infantil).** Valencia.
19. **Hospital Universitario Fundación Jiménez Díaz y Hospital Universitario Rey Juan Carlos.** Madrid.
20. **Hospital Universitario Son Espases.** Palma de Mallorca.
21. **Hospital Universitario La Fé (Adultos).** Valencia.
22. **Hospital Clínico Universitario de Salamanca.** Salamanca.
23. **Hospital de Bellvitge.** Hospitalet del Llobregat. Barcelona.
24. **Hospital Universitario de La Princesa.** Madrid.
25. **Policlínica Guipúzcoa.** San Sebastián. Guipúzcoa.
26. **Clínica Los Manzanos.** Logroño
27. **Hospital Universitario Clínico San Carlos.** Madrid.
28. **Hospital de Sant Pau.** Barcelona.
29. **Hospital Universitario Dr. Negrín.** Las Palmas de Gran Canaria
30. **Hospital Álvaro Cunqueiro.** Vigo.Pontevedra
31. **Hospital Materno Infantil Vall d’Hebrón (Infantil)**. Barcelona.
32. **Hospiten Rambla.** Santa Cruz de Tenerife.
33. **Complejo Hospitalario Universitario materno infantil de Las Palmas (Infantil).** Gran Canaria
34. **Hospital Vall d’Hebrón. (Adultos).** Barcelona.
35. **Hospital Universitario Marqués de Valdecilla.** Santander. Cantabria
36. **Hospital Clinic i Provincial.** Barcelona.
37. **Hospital Regional Universitario Carlos Haya (Adultos e Infantil).** Málaga.
38. **Hospital Universitario Puerta de Hierro-Majadahonda.** Madrid.
39. **Hospital neoláser cardiovascular.** Sevilla.
40. **Hospital Universitario Gregorio Marañón (Adultos).** Madrid.
41. **Hospital Universitario de León.** León.
42. **Hospital Universitario Miguel Servet (Adultos e Infantil).** Zaragoza.
43. **Hospital Universitario Virgen de la Macarena.** Sevilla.
44. **Complejo Hospitalario Universitario A Coruña (Adultos e Infantil).** ACoruña.
45. **Hospital Sant Joan de Déu (Infantil).** Barcelona.
46. **Hospital General de Alicante.** Alicante.
47. **Hospital Clínico.** Valencia.
48. **Hospital Ramón y Cajal. (Adultos).** Madrid.
49. **Hospital 12 de Octubre (Adultos).** Madrid.
50. **Policlínica Miramar.** Palma de Mallorca.
51. **Hospital universitario de Cruces (Adultos e Infantil).** Baracaldo. Vizcaya.
52. **Hospital de Basurto.** Bilbao**.** Vizcaya.
53. **Hospital del Vinalopó.** Alicante.
54. **Complejo Hospitalario de Toledo.** Toledo.
55. **Hospital Casa de Salud.** Valencia.
56. **Hospital de la Ribera.** Alzira. Valencia.
57. **Hospital 12 de Octubre. (Infantil).** Madrid.
58. **Hospital Universitario Virgen de las Nieves (Adultos e Infantil).** Granada.
59. **Hospital Universitario Virgen del Rocío (Adultos e Infantil).** Sevilla.
60. **Hospital Quirón.** Tenerife
61. **Cardiofast.** Madrid
62. **Clínica Universidad de Navarra.** Pamplona. Navarra.
63. **Hospital Universitario Reina Sofía (Adultos e Infantil).** Córdoba.
64. **Hospital General de Cataluña.** Sant Cugat. Barcelona.
65. **Hospital Universitario Quirón salud.** Madrid.
66. **Hospital Modelo.** La Coruña.
