# Supplementary material
Source: Elsevier journal article supplement (https://www.sciencedirect.com/science/article/pii/S1134009618301980)
Supplement: mmc3 [file S1134009618301980:mmc3.docx]

**Anexo-III**: Cirugía de las cardiopatías congénitas con circulación extracorpórea en 2017.

| CONGENITOS CON CEC | Casos | éxitus | % éxitus observado | Aristóteles Básico | % éxitus esperado* |
| --- | --- | --- | --- | --- | --- |
| CIA | 347 | 3 | 0,86 % | 2,98 | <1 % |
| Drenaje venoso pulmonar anómalo +/- CIA | 71 | 0 | 0 % | 5,9 | 5-10 % |
| Drenaje Venoso pulmonar anómalo total | 19 | 4 | 21,05 % | 9,36 | 5-10 % |
| CIV (incluye DSVD sin EP) | 251 | 3 | 1,19 % | 6,91 | 5-10 % |
| DPSAV (ostium primum y transicional) | 60 | 1 | 1,66 % | 5,2 | 5-10 % |
| Defecto completo del Septo auriculoventricular | 40 | 2 | 5 % | 9,04 | 5-10 % |
| T.Fallot o situación Fallot (Incluye AP+CIV y DSVD tipo Fallot) | 144 | 2 | 1,39 % | 8,51 | 5-10 % |
| Atresia pulmonar+CIV+MAPCAS | 29 | 2 | 6,89 % | 10,63 | 10-20 % |
| D-TGA con septo intacto | 81 | 5 | 6,17 % | 10,01 | 10-20 % |
| D-TGA compleja (asociada a CIV y/o arco y/o EP) | 35 | 4 | 11,42% | 12,13 | 10-20 % |
| Truncus arterioso | 8 | 1 | 12,5 % | 11 | 10-20 % |
| Estenosis aórtica discreta subvalvular (Membrana; Miomectomía) | 69 | 2 | 2,9 % | 6,4 | 5-10 % |
| Estenosis aórtica supravalvular | 12 | 1 | 8,33 % | 7,31 | 5-10 % |
| Sustitución valvular aórtica | 38 | 0 | 0 % | 8,58 | 5-10 % |
| Plastia valvular aórtica | 29 | 0 | 0 % | 8 | 5-10 % |
| Reemplazo de raíz aórtica (Ross y Ross-Konno) | 19 | 1 | 5,26 % | 12,53 | 10-20 % |
| Reemplazo de raíz aórtica (Bentall y Bentall-Konno) | 12 | 0 | 0 % | 9,23 | 10-20 % |
| Técnicas de remodelado y reemplazo de raíz (Yacoub, David y variantes) | 5 | 0 | 0 % | 8,9 | 5-10 % |
| Sustitución valvular mitral | 21 | 2 | 9,52 % | 7,83 | 5-10 % |
| Plastia valvular mitral | 36 | 2 | 5,55 % | 8,15 | 5-10 % |
| Sustitución valvular tricuspídea | 6 | 1 | 16,67 % | 8,2 | 5-10 % |
| Plastia valvular tricuspídea aislada | 24 | 0 | 0 % | 7,51 | 5-10 % |
| Válvula pulmonar plastia | 27 | 0 | 0 % | 6,34 | 1-5 % |
| Válvula pulmonar sustitución | 115 | 1 | 0,87 % | 6,89 | 5-10 % |
| Procedimientos sobre dos válvulas | 35 | 3 | 8,57 % | 8,93 | 5-10 % |
| Procedimientos sobre tres o más válvulas | 0 |  |  |  |  |
| Glenn | 38 | 3 | 7,89 % | 7,86 | 5-10 % |
| Fontan y variantes | 29 | 0 | 0 % | 9,1 | 5-10 % |
| Conversión de Fontan | 1 | 1 | 100 % | 10 | 10-20 % |
| Cirugía arco aórtico (interrupción, hipoplasia) | 54 | 1 | 1,85 % | 10,63 | 10-20 % |
| ALCAPA y anomalías coronarias | 19 | 0 | 0 % | 10 | 5-10 % |
| Fístula sistémico pulmonar con CEC | 15 | 1 | 6,67 % | 7,93 | 5-10 % |
| Norwood y variantes corazón izquierdo hipoplásico | 28 | 6 | 21,42 % | 14,79 | >20 % |
| Trasplante cardíaco | 27 | 0 | 16,66 % | 9,37 | 10-20 % |
| Trasplante cardiopulmonar | 1 | 0 | 0 % | 13,3 | 10-20 % |
| Otros con CEC | 98 | 7 | 7,14 % | 8,7 | 5-10 % |
| TOTAL CONGÉNITOS CON CEC | 1843 | 59 | 3,2 % | 7,  7,25** | 5-10 % |
| *Pacientes congénitos menores de 1 mes con CEC* | 184 | 15 | 8,15 % | 10,45 | 10-20 % |
| *Pacientes congénitos mayores de 18 años con CEC* | 471 | 6 | 1,27% | 2,99 | 1-5 % |

CIA: comunicación interauricular, CIV: comunicación interventricular, DSVD: doble salida del ventrículo derecho, EP: estenosis pulmonar, DPSAV: defecto parcial del septo auriculoventricular, T. Fallot: tetralogía de Fallot, AP: atresia pulmonar, MAPCAS: colaterales aorto-pulmonares mayores, D-TGA: D-trasposición de grandes arterias, ALCAPA: arteria coronaria anómala saliendo de la arteria pulmonar, CEC: circulación extracorpórea

*Rango de mortalidad esperada según escala de Aristóteles básico por grupos de patología.

**Media ponderada de la clasificación del riesgo según escala de Aristóteles básico para el total de cirugía congénita con CEC.
