# Supplementary material
Source: Elsevier journal article supplement (https://www.sciencedirect.com/science/article/pii/S1134009618301980)
Supplement: mmc4 [file S1134009618301980:mmc4.docx]

**Anexo-IV:** Cirugía de las cardiopatías congénitas sin circulación extracorpórea en 2017.

| CONGENITOS SIN CEC | Casos | Nº éxitus | % éxitus observado | Aristóteles Básico | % éxitus esperado* |
| --- | --- | --- | --- | --- | --- |
| Fístulas sistémico-pulmonares | 8 | 1 | 12,5 % | 6,99 | 5-10 % |
| Banding arteria pulmonar | 32 | 3 | 9,37 % | 6,1 | 1-5 % |
| Coartación de aorta | 71 | 1 | 1,4 % | 7,46 | 5-10 % |
| Ductus <2,5 kg | 95 | 3 | 3,15 % | 3,44 | 1-5 % |
| Ductus >2,5 kg | 12 | 2 | 16,67 % | 3 | 1-5 % |
| Reparación de anillo vascular | 15 | 1 | 6,67 % | 6 | 1-5 % |
| Otros | 51 | 0 | 0 % | 5,88 | 5-10 % |
| TOTAL CONGENITOS SIN CEC | 284 | 11 | 3,87 % | 5,4** | 5-10 % |
| *Pacientes congénitos menores de 1 mes sin CEC* | 165 | 3 | 1,82 % | 4,72 | 1-5% |
| *Pacientes congénitos mayores de 18 años sin CEC* | 17 | 0 | 0 % | 5,45 | 1-5% |

*Rango de mortalidad esperada según escala de Aristóteles por grupos de patología.

**Media ponderada de la clasificación del riesgo según escala de Aristóteles para total de cirugía congénita sin CEC.
